# Supplementary material
Source: PubMed Central journal article supplement (PMC4996320)
Supplement: NIHMS57841-supplement-Supporting_information.pdf [file NIHMS57841-supplement-Supporting_information.pdf]

1 **Supporting Information Figures S1- S4**

2 **Figure S1**

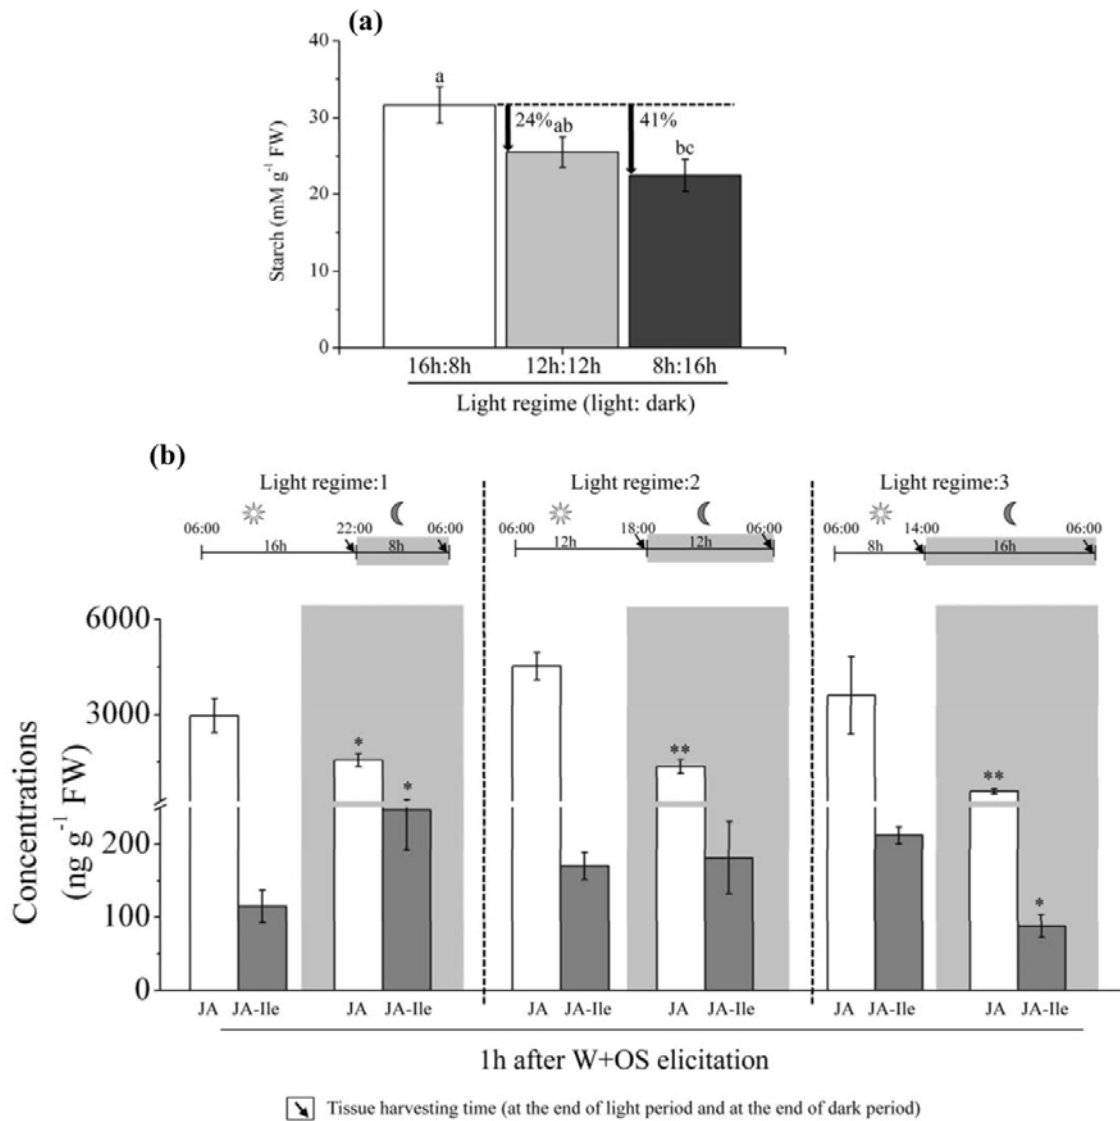

3

4 **Figure S1: Extended night series depletes starch levels in WT *N. attenuata* plants and**

5 **only a severe decrease in net C-gain attenuates the OS-elicited JA-Ile burst in WT**

6 **plants.** Rosette stage WT plants [normally grown under 16h: 8h (light: dark) regime] were

7 exposed to three different light: dark periods, (16h: 8h, 12h: 12h, and 8h: 16h for one day)

8 representing an extended night-series known to deplete C-reserves (Smith & Stitt, 2007). (a)

9 Net C-gain was measured in terms of accumulated starch at the end of light period in the

10 plants grown under 16h: 8h, 12h: 12h, and 8h: 16h were considered as normal (control),

11 moderate (24%) and severely (41%) depleted at the time of OS-elicitation, respectively.  
12 Values are means ( $\pm$  SE) of three replicate plants from each treatment. Small letters indicate  
13 significant differences in starch accumulation at  $P \leq 0.05$  by one-way ANOVA. Fully  
14 expanded rosette leaves (+1) were wounded with a pattern wheel and treated with 20 $\mu$ L *M.*  
15 *sexta* OS (1:1 diluted with water). Tissues were harvested after 1h of elicitation which  
16 corresponded to the end of light and dark periods, respectively. **(b)** A moderate decrease in net  
17 C-gain did not alter the level of JA-Ile; however, a severe decrease in net C-gain significantly  
18 reduced the accumulation of only JA-Ile. Values are means ( $\pm$  SE) of three replicate plants  
19 from each treatment. Small letters and capital letters indicate significant differences in JA and  
20 JA-Ile accumulation respectively, at  $P \leq 0.05$  by one-way ANOVA. W+OS = wound + *M.*  
21 *sexta* oral secretion.

22

23

24

25

26

27

28

29

30

31

32

33

34

35

36

37 **Figure S2**

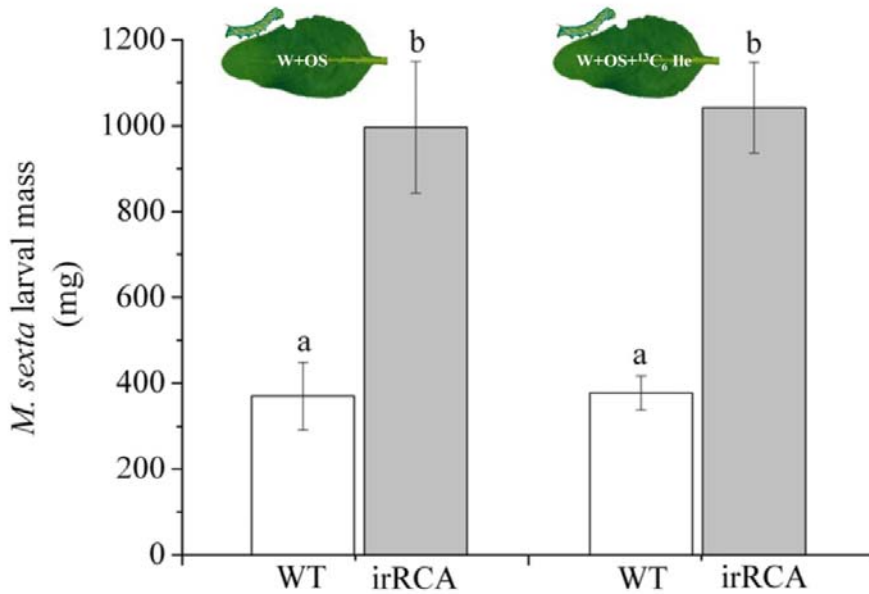

38

39 **Figure S2: Impaired herbivore resistance in RCA-silenced plants could not be attributed**

40 **to the lower Ile pools at the wound site.** Decreased Ile pools at the wound site, as seen in

41 threonine deaminase-silenced plants, can influence the accumulation of JA-Ile and

42 consequently resistance to *M. sexta* larvae. However, the Ile deficiency can be readily restored

43 by supplementing OS with an excess of Ile in the OS-elicitation procedure (Kang *et al.*, 2006).

44 Therefore, *M. sexta* larvae were reared on W+OS or W+OS+<sup>13</sup>C<sub>6</sub> Ile treated WT and RCA-

45 silenced plants and their mass gain was recorded. *M. sexta* larvae reared on W+OS or

46 W+OS+<sup>13</sup>C<sub>6</sub> Ile treated RCA-silenced plants gained significantly more body mass than did

47 larvae on similarly treated WT plants. Values are means of 15 ( $\pm$  SE) replicate larvae.

48 Different letters indicate significant differences at  $P \leq 0.05$ . W+OS = wound + *M. sexta* oral

49 secretion.

50

51

52

53

54 **Figure S3**

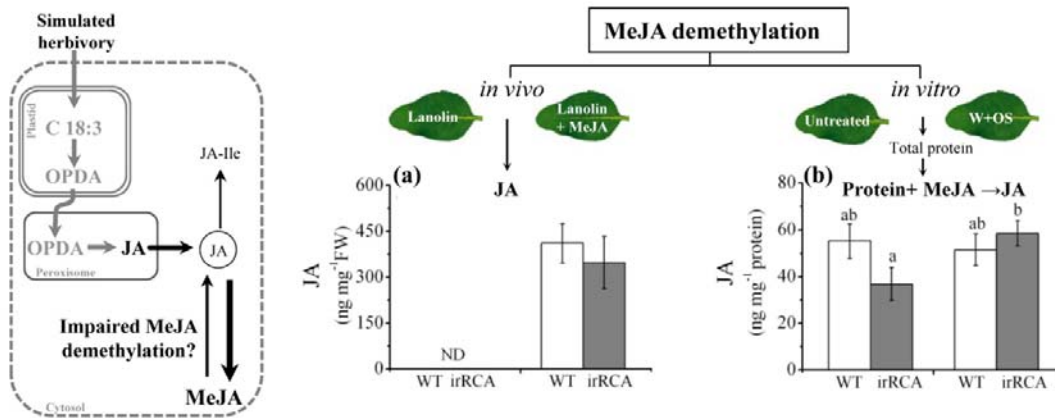

55

56

57 **Figure S3: Increased MeJA level in RCA-silenced plants does not result from impaired**

58 **demethylation activity.** MeJA-methyl-esterase activity was estimated by measuring the

59 accumulation of JA after MeJA addition, *in vivo* and *in vitro*. The de-esterification of MeJA to

60 produce JA (*in vivo* and *in vitro*) was similar in WT and RCA-silenced plants. Values are

61 means ( $\pm$  SE) of 4-5 replicate plants from each genotype and each treatment. Different letters

62 indicate the significant difference at  $P \leq 0.05$ . W+OS = wound + *M. sexta* oral secretion.

63

64

65

66

67

68

69

70

71

72 **Figure S4.**

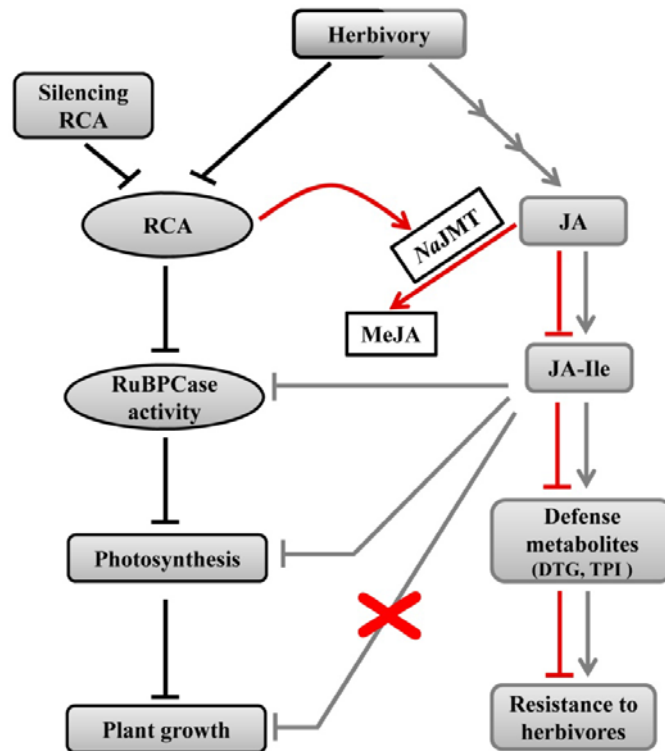

73

74 **Figure S4: An overview of the consequences of herbivory and RCA's novel role in the**  
75 **attenuation of *N. attenuata*'s defense responses.** In *N. attenuata*, RCA-silencing redirects  
76 attack-induced JA flux from JA-Ile to MeJA via elevated methyl transferase activity and  
77 reduces JA-Ile level, JA-induced defense compounds DTGs and TPI and consequently  
78 herbivore resistance in *N. attenuata* plants. Black lines depict the previously known  
79 consequences of RCA-silencing, gray arrows, the interaction between herbivory-induced JA-  
80 mediated defense pathway and photosynthesis and growth, and red arrows, the novel  
81 regulatory role of RCA in tuning JA-signaling.

82
